# Supplementary material for: The Role of Microbiome and Virome in Idiopathic Pulmonary Fibrosis
Source: MDPI journal article supplement (doi:10.3390/biomedicines9040442), 2021-04-20
Supplement: s1 [file s1]

| Studies investigating the microbiome and virome in IPF and their main results and microbial populations |                                                                                                                                                                          |                                                                       |                                                                                                                                                                                                                                                                                                                                                                                                                                                                                                |
|---------------------------------------------------------------------------------------------------------|--------------------------------------------------------------------------------------------------------------------------------------------------------------------------|-----------------------------------------------------------------------|------------------------------------------------------------------------------------------------------------------------------------------------------------------------------------------------------------------------------------------------------------------------------------------------------------------------------------------------------------------------------------------------------------------------------------------------------------------------------------------------|
| Study                                                                                                   | Method                                                                                                                                                                   | Disease                                                               | Main results related to IPF/Microbial population in IPF patients                                                                                                                                                                                                                                                                                                                                                                                                                               |
| Richter et al (28)                                                                                      | Quantitative cultures of BAL                                                                                                                                             | IPF<br>ANCA-related<br>Coccidiomycosis<br>(Wegener<br>granulomatosis) | BAL cultures positive in 8/22 IPF patients: <i>Haemophilus influenzae</i><br><i>Haemophilus parainfluenzae</i><br><i>Moraxella catarrhalis</i><br><i>Pseudomonas aeruginosa</i><br><i>Proteus mirabilis</i><br><i>Streptococcus pneumoniae</i>                                                                                                                                                                                                                                                 |
| Friaza et al (29)                                                                                       | 16S-rDNA PCR - denaturing gradient gel electrophoresis - bacterial band identification in BAL                                                                            | IPF                                                                   | Identified organisms normally present in the oropharynx<br>Bacterial sequences corresponding to the <i>Streptococcus</i> , <i>Neisseria</i> and <i>Actinobacterium</i> genera.<br><i>Pneumocystis jirovecii</i> may impair bacterial colonization of the airways                                                                                                                                                                                                                               |
| Garzoni et al (30)                                                                                      | 16S-rRNA gene sequencing of BAL                                                                                                                                          | IIP<br>Sarcoidosis<br>Normal controls<br>PCP                          | No significant differences between<br>ILD and healthy controls.<br><i>Prevotellaceae</i> , <i>Streptococcaceae</i> and <i>Acidaminococcaceae</i>                                                                                                                                                                                                                                                                                                                                               |
| Han et al (31)                                                                                          | 454 pyrosequencing was used to assign OTUs in BAL                                                                                                                        | IPF                                                                   | <i>Prevotella</i> , <i>Veillonella</i> and <i>Cronobacter</i> spp<br><i>Streptococcus</i> OTU1345<br><i>Staphylococcus</i> OTU1348                                                                                                                                                                                                                                                                                                                                                             |
| Molyneaux et al (24)                                                                                    | 16S rRNA qPCR and pyrosequencing in BAL                                                                                                                                  | IPF                                                                   | Patients with IPF had double the burden of bacteria in BAL fluid<br>Baseline bacterial burden predicted the rate and risk of death and was associated independently with the rs35705950 polymorphism of the MUC5B mucin gene<br><i>Veillonella</i> , <i>Neisseria</i> , <i>Streptococcus</i> and <i>Haemophilus</i> spp were more abundant in IPF than controls                                                                                                                                |
| Invernizzi et al (32)                                                                                   | Amplification of the V4 hypervariable region of the 16S rRNA gene in BAL                                                                                                 | IPF vs HP                                                             | Distinct differences in the microbial profiles were evident in the lower airways of subjects with CHP and IPF<br><br><i>IPF Firmicutes</i> phyla, <i>Actinomyces</i> and <i>Veillonella</i> genera<br><i>HP Proteobacteria</i> phyla, <i>Actinomyces</i> and <i>Veillonella</i> genera                                                                                                                                                                                                         |
| Takahashi et al (33)                                                                                    | Amplification of the V2–4-8 and V3–6, 7–9 hypervariable region of the 16S rRNA gene in BAL                                                                               | IPF<br>Bleomycin-treated mice                                         | The most prevalent lung phyla were <i>Firmicutes</i> , <i>Proteobacteria</i> and <i>Bacteroidetes</i> .<br>Decreased microbial diversity was associated with low FVC and early mortality.<br>Diversity and abundance of <i>Firmicutes</i> , <i>Streptococcaceae</i> , and <i>Veillonellaceae</i> were significantly associated with FVC, 6-min walk distance, and serum surfactant protein D<br>Bleomycin-induced lung fibrosis resulted in decrease of diversity and alteration of microbiota |
| Valenzi et al (34)                                                                                      | PCR amplification and sequencing of the 16S rRNA gene in parenchymal and airways tissue samples                                                                          | IPF<br>CTD-ILD<br>CF<br>COPD<br>Normal Subjects                       | Airway-based samples had higher bacterial load compared to parenchymal<br>Bacterial load was lower in IPF compared to CF and controls                                                                                                                                                                                                                                                                                                                                                          |
| Calabrese et al (36)                                                                                    | Nucleic acids were extracted from fresh lung tissues using a modified RNAzol method<br>RT-PCR, PCR or nested-PCR were used to detect principal respiratory viral genomes | IPF<br>Normal subjects                                                | Higher frequency of virus positive cases was found in IPF<br>Only herpes virus genomes were detected<br>Viral cases showed higher mPAP, poorer performance in the six minute walking test and higher frequency of primary graft dysfunction                                                                                                                                                                                                                                                    |

|                      |                                                                                                                                           |                               |                                                                                                                                                                                                                                                                                                                          |
|----------------------|-------------------------------------------------------------------------------------------------------------------------------------------|-------------------------------|--------------------------------------------------------------------------------------------------------------------------------------------------------------------------------------------------------------------------------------------------------------------------------------------------------------------------|
| Yin et al (43)       | Surgical lung biopsies<br>viral RNA qPCR                                                                                                  | IPF                           | 740 viruses were quantified<br>Key sequencing results were confirmed for specific viruses (EBV, HCV, herpesvirus saimiri and HERV-K)                                                                                                                                                                                     |
| Molyneaux et al (46) | DNA extraction from BAL<br>A hyper-variable region of the 16S ribosomal RNA gene (16S rRNA) was amplified, quantified and pyrosequenced   | IPF                           | Increased burden 4-fold<br>Shift from stable disease OTUs<br>A significant increase was noticed for <i>Proteobacteria</i> , <i>Campylobacter spp.</i> and <i>Stenotrophomonas spp.</i> , while a significant decrease was found in <i>Veillonella spp.</i> and <i>Campylobacter spp.</i>                                 |
| Weng et al (47)      | Antiviral/bacterial IgM in Sputum cultures<br>RNA sequences of pathogens in nasopharyngeal swab of IPF patients were detected by PathChip | IPF                           | Thirty-eight different bacterial strains were detected in IPF patient sputum - 89% were gram-negative bacteria:<br><i>Klebsiella pneumonia</i> 26%<br><i>Mycobacteria tuberculosis</i> 21%<br><i>Acinetobacter baumannii</i> 10%<br>Fifty-seven different viruses were detected in nasopharyngeal swabs of IPF patients. |
| O'Dwyer et al (49)   | DNA extraction from mouse tissue and human BAL<br>Droplet digital PCR for the 16S rRNA gene                                               | IPF<br>Bleomycin-treated mice | Lung Bacterial Burden Predicts Disease Progression in IPF<br>Bleomycin induces fibrosis of equal severity to both germ-free and conventional mice; however the germ-free mice were protected against mortality                                                                                                           |
| Wootton et al (51)   | Multiplex PCR, pan-viral microarray and high-throughput cDNA sequencing in BAL                                                            | IPF<br>AE-IPF<br>ALI          | Viral nucleic acid was detected in cases of AE-IPF but not in stable disease<br>Evidence of viral infection with herpes simplex virus, Epstein-Barr virus and torque teno virus (TTV) in patients with acute exacerbation<br>TTV infection was significantly more common in patients with acute exacerbation             |

BAL Bronchoalveolar lavage; IPF Idiopathic Pulmonary Fibrosis; ANCA Antineutrophil Cytoplasmic Antibody; PCR Polymerase Chain Reaction; IIP Idiopathic Interstitial Pneumonia; PCP Pneumocystis Jirovecii Pneumonia; ILD Interstitial Lung Disease; OTU Operational Taxonomic Unit; qPCR Quantitative Polymerase Chain Reaction; CHP Chronic Hypersensitivity Pneumonitis; FVC Forced Vital Capacity; CTD-ILD Connective Tissue Disease – Interstitial Lung Disease; CF Cystic Fibrosis; COPD Chronic Obstructive Lung Disease; mPAP mean Pulmonary Artery Pressure; EBV Epstein-Barr Virus; HCV Hepatitis C Virus; HERV-K Human Endogenous Retrovirus type K;
